27. Berg H, Roed J, Viby-Mogensen J, Mortensen CR, Engbaek J, Skovgaard LT, Krintel JJ: Residual neuromuscular block is a risk factor for postoperative pulmonary complications. A prospective, randomised, and blinded study of postoperative pulmonary complications after atracurium, vecuronium and pancuronium. *Acta Anaesthesiol Scand* 1997; 41:1095–103
28. Kirkegaard H, Heier T, Caldwell JE: Efficacy of tactile-guided reversal from cisatracurium-induced neuromuscular block. *ANESTHESIOLOGY* 2002; 96:45–50
29. Kim KS, Cheong MA, Lee HJ, Lee JM: Tactile assessment for the reversibility of rocuronium-induced neuromuscular blockade during propofol or sevoflurane anesthesia. *Anesth Analg* 2004; 99:1080–5
30. Fuchs-Buder T, Meistelman C, Alla F, Grandjean A, Wuthrich Y, Donati F: Antagonism of low degrees of atracurium-induced neuromuscular blockade: Dose-effect relationship for neostigmine. *ANESTHESIOLOGY* 2010; 112:34–40
31. Fuchs-Buder T, Baumann C, De Guis J, Guerci P, Meistelman C: Low-dose neostigmine to antagonise shallow atracurium neuromuscular block during inhalational anaesthesia: A randomised controlled trial. *Eur J Anaesthesiol* 2013; 30:594–8
32. Schaller SJ, Fink H, Ulm K, Blobner M: Sugammadex and neostigmine dose-finding study for reversal of shallow residual neuromuscular block. *ANESTHESIOLOGY* 2010; 113:1054–60
33. Choi ES, Oh AY, Seo KS, Hwang JW, Ryu JH, Koo BW, Kim BG: Optimum dose of neostigmine to reverse shallow neuromuscular blockade with rocuronium and cisatracurium. *Anaesthesia* 2016; 71:443–9

## ANESTHESIOLOGY REFLECTIONS FROM THE WOOD LIBRARY-MUSEUM

### From *Venus and Adonis*: Shakespearean Inebriation and Colton Gas

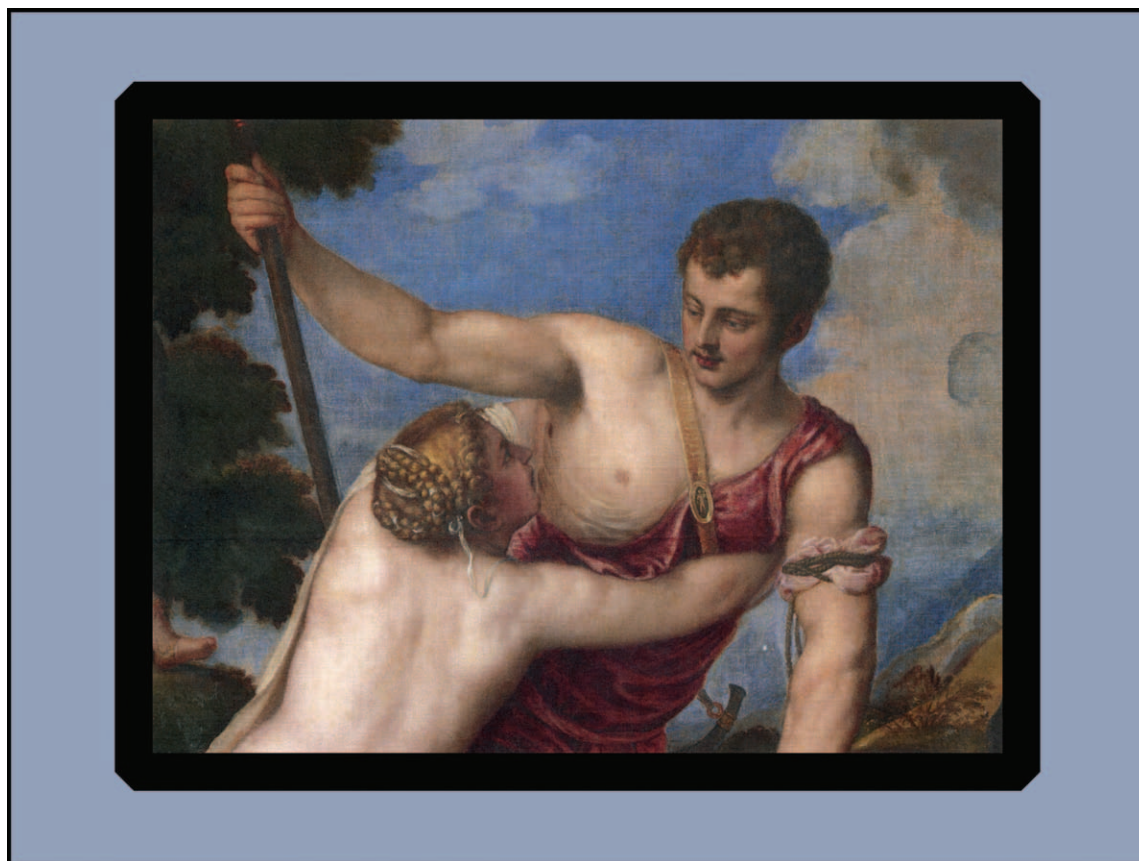

As painted in 1554 by Titian, lovesick Venus (*left*) throws herself shamelessly at disdainful Adonis (*right*), her handsome foster son. In Shakespeare's narrative poem, *Venus and Adonis*, the goddess "treads the path that she untreads again" as she frets about the safety of Adonis. The Bard compares her behavior to "the proceedings of a drunken brain." The author of *Shakspeare [sic] and the Bible*, nitrous oxide pioneer G. Q. Colton (1814 to 1898) parlayed the American public's awareness of "drunken" behavior at recreational demonstrations of his "Colton gas" into public confidence in trying an apparently familiar agent, laughing gas, as an anesthetic for dental extraction. (Copyright © the American Society of Anesthesiologists' Wood Library-Museum of Anesthesiology.)

George S. Bause, M.D., M.P.H., Honorary Curator, ASA's Wood Library-Museum of Anesthesiology, Schaumburg, Illinois, and Clinical Associate Professor, Case Western Reserve University, Cleveland, Ohio. UJYC@aol.com.
